# Supplementary material for: Sequential activation of uterine epithelial IGF1R by stromal IGF1 and embryonic IGF2 directs normal uterine preparation for embryo implantation
Source: PubMed Central journal article supplement — J Mol Cell Biol. 2021 Jun 7;13(9):646–61. doi: 10.1093/jmcb/mjab034 (PMC8648386; doi:10.1093/jmcb/mjab034), 2021-06-07
Supplement: mjab034_supplementary_data.pdf [file mjab034_supplementary_data.pdf]

## Supplementary material

### Sequential activation of uterine epithelial IGF1R by stromal IGF1 and embryonic IGF2 directs normal uterine preparation for embryo implantation

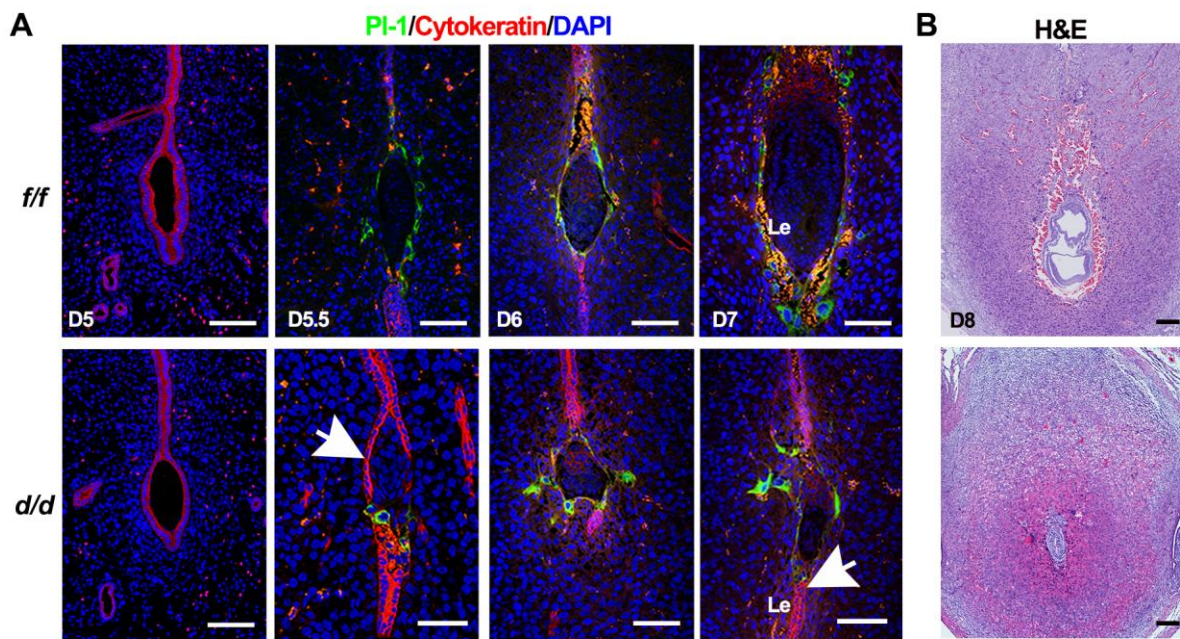

#### Supplementary Figure S1. Post-implantation embryo development in control and knockout mice.

(A) Cytokeratin and PI-1 were used to mark uterine epithelium and the outermost layer trophoblast of fetus separately from D5-D7 of pregnancy, and the fluorescent results indicated developmental retardation of a few embryos in KO uterus. (B) HE staining of D8 implantation sites of uteri, and the embryos had stopped growth and been absorbed. Scale bars, 50  $\mu$ m. Le, luminal epithelium; the arrow indicted the persistent epithelium in the implantation chamber surrounding the embryos.

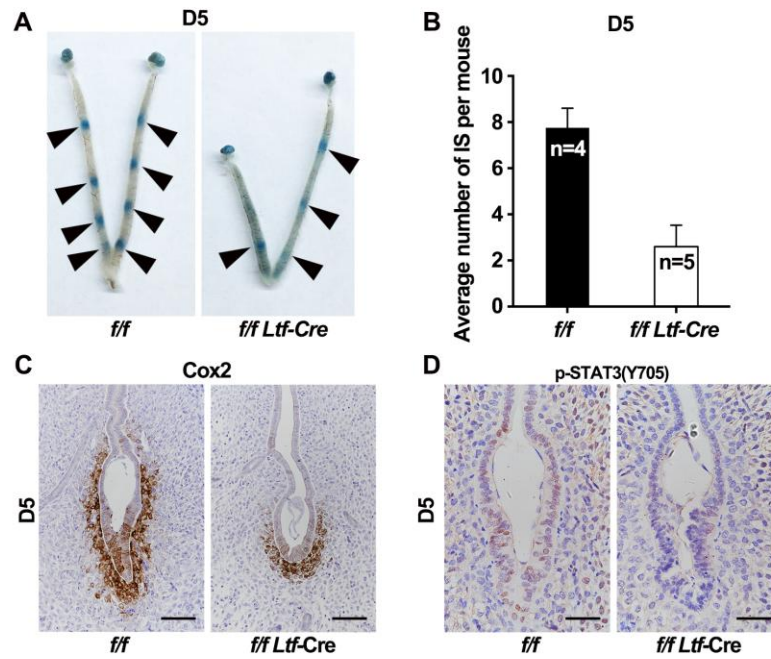

**Supplementary Figure S2. Uterine epithelial-specific deletion of IGF1R impaired embryo implantation.** (A and B) The average number of implantation sites (IS) showed an apparent decrease in *Igf1r<sup>f/f</sup>/Ltf-cre* mice on D5. (C) Immunohistochemical analysis of Cox2 protein in *Igf1r<sup>f/f</sup>* and *Igf1r<sup>f/f</sup>/Ltf-cre* uteri with a blastocyst on D5 morning. scale bars, 100  $\mu$ m. (D) Immunohistochemical analysis of pStat3 (Y705) in uteri with a blastocyst on D5 morning. Scale bars, 50  $\mu$ m.

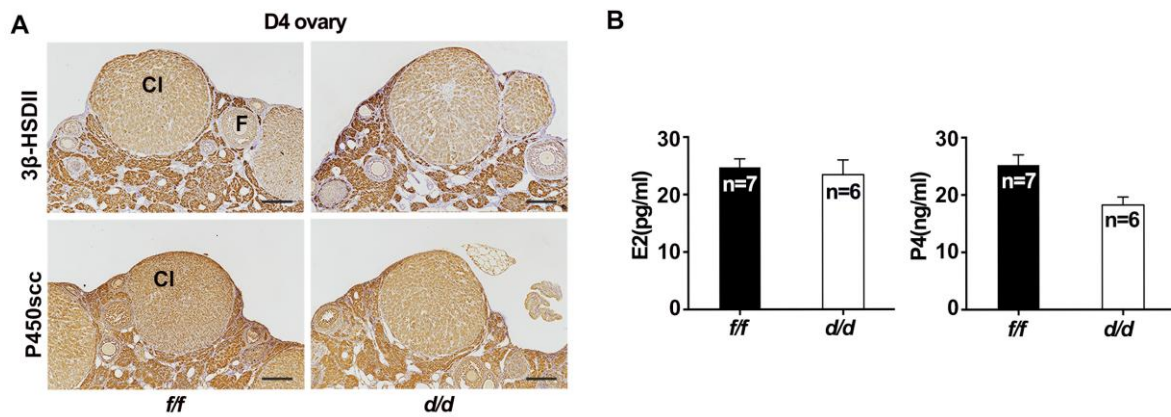

**Supplementary Figure S3. Hormone levels are comparable between *Igf1r<sup>f/f</sup>* and *Igf1r<sup>d/d</sup>* mice on D4. (A)** Immunohistochemical staining of 3 $\beta$ -HSDII and P450scc in D4 *Igf1r<sup>f/f</sup>* and *Igf1r<sup>d/d</sup>* ovaries. CL, corpus luteum; F, follicle. Scale bars, 200  $\mu$ m. **(B)** Serum levels of E<sub>2</sub> and P<sub>4</sub> in *Igf1r<sup>f/f</sup>* and *Igf1r<sup>d/d</sup>* mice on D4 of pregnancy.

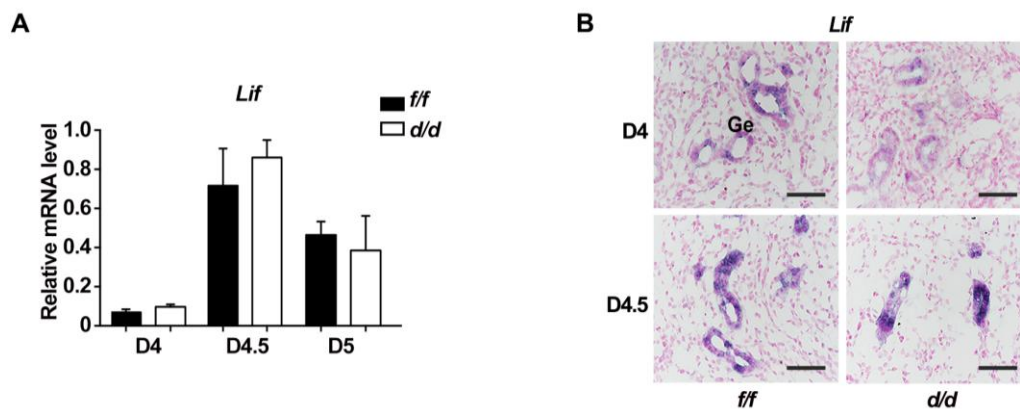

**Supplementary Figure S4. The expression of LIF was comparable between *Igf1r<sup>f/f</sup>* and *Igf1r<sup>d/d</sup>* uteri. (A)** The *Lif* mRNA level in *Igf1r<sup>f/f</sup>* and *Igf1r<sup>d/d</sup>* uteri from D4 to D5 as detected by quantitative real-time PCR. The values are normalized to the *Gapdh* expression level and indicated as the mean  $\pm$  SEM, n=3. \*,  $P < 0.05$ . **(B)** *In situ* hybridization of *Lif* in *Igf1r<sup>f/f</sup>* and *Igf1r<sup>d/d</sup>* uteri on D4 and D4.5. Ge, glandular epithelium; Bl, blastocyst; S, stroma. Scale bars, 50  $\mu$ m.

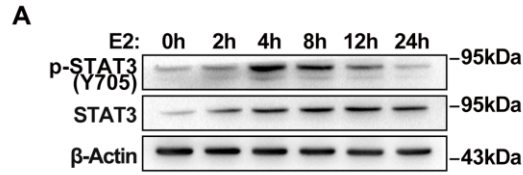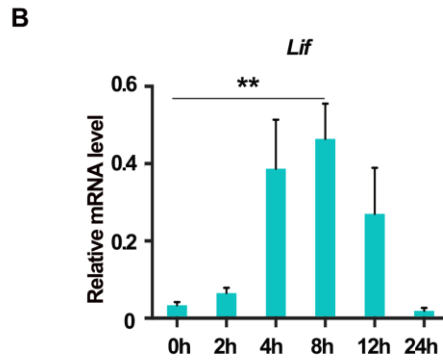

**Supplementary Figure S5. E<sub>2</sub> increased the levels of STAT3 activation and *Lif* expression.** (A) The expression level of p-STAT3 (Y705) and STAT3 proteins in D4 WT mouse uteri in response to E<sub>2</sub> treatment. Actin served as the loading control. (B) Quantitative real-time PCR analysis of *Lif* mRNA expression in WT mouse uteri in response to E<sub>2</sub> treatment. The values are normalized to the *gapdh* expression level and indicated as the mean ± SEM. n=3.

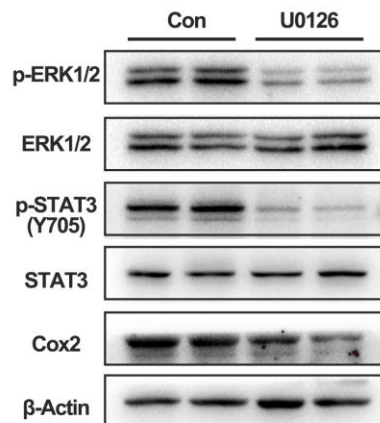

**Supplementary Figure S6. U0126 treatment reduced ERK and STAT3 activation.** Western blot analysis for the indicated protein in D4 uteri. The uteri were treated with IGF2 recombinase protein, combined with the control or U0126 injection for 6 hours. Actin served as the loading control.

**Supplementary Table S1. Quantitative real-time PCR primers.**

| <b>Primer name</b> | <b>Sequence</b>           |
|--------------------|---------------------------|
| Msx1 F             | CTTCCTCCTGGTTGTCGCT       |
| Msx1 R             | CTCTTGGCCTCTGCACCCTTAGTTT |
| Lif F              | GAGAGATTTCTGTCTCACTC      |
| Lif R              | CTTCCAAAGTTTCTCTGAGA      |
| CLDN1 F            | CTGGTAGAGGTAATGTGAGT      |
| CLDN1 R            | GAGATACAGAACAGTTGAAGG     |
| CLDN3 F            | CCAGGAGAGGAGCCGTTAAG      |
| CLDN3 R            | GCTGGACCTGGGAATCAACT      |
| CLDN4 F            | CCACTCTGTCCACATTGCCT      |
| CLDN4 R            | CTTTGCACAGTCCGGGTTTG      |
| CLDN7 F            | GCTATGACTGGAGGCATT        |
| CLDN7 R            | GTGACAATCTGATGACCAATC     |
| CLDN8 F            | GCCCTCTACATAGGCTGGAC      |
| CLDN8 R            | GAAACTCCGTTGAGTGGTGC      |
| CLDN15 F           | CGTGGGCAACATGGATCTCT      |
| CLDN15 R           | CCACGAGATAGCCACCATCC      |
| Occludin F         | TGCTGCTGATGAATATAATAGAC   |
| Occludin R         | ATCCTCTTGATGTGCGATAA      |
| Igf1r F            | GCAGACACTACTACTACAAAG     |
| Igf1r R            | ACTCATCGTCGTGGATAA        |
| Igf1 F             | CGCTCTGCTTGCTCACCTTAC     |
| Igf1 R             | AATGCTGGAGCCATAGCCTGTG    |
| Cdh1 F             | GAGACCAGTTTCCTCGTCCG      |
| Cdh1 R             | AGCAGCTCTGGGTTGGATTC      |
| Ctnna1 F           | ACGGTCTGGAGAAGGAAGGT      |
| Ctnna1 R           | ACACGAGCCCGAATAAAGCA      |
| Ctnnb1 F           | AGGATGATCCCAGCTACCGT      |
| Ctnnb1 R           | AGATCAGGCAGCCCATCAAC      |
| Ptgs2 F            | GTCTGGTGCCTGGTCTGATGAT    |
| Ptgs2 R            | GTGGTAACCGCTCAGGTGTTG     |
| Bmp2 F             | GATCTGTACCGCAGGCACTCA     |
| Bmp2 R             | AGTTCCTCCACGGCTTCTTCG     |

|          |                          |
|----------|--------------------------|
| Igf2 F   | TGCTGCATCGCTGCTTACGG     |
| Igf2 R   | GACGGTTGGCACGGCTTGAA     |
| Esr1 F   | TGCCTCTGGCTACCATTAT      |
| Esr1 R   | TGCCCACTTCGTAACACTT      |
| Pgr F    | ACCTGATCTAATCCTAAATGA    |
| Pgr R    | ATTGTGTTAAGAAGTAGTAAGAC  |
| Ihh F    | CATCTTCAAGGACGAGGAGAACA  |
| Ihh R    | CATGACAGAGATGGCCAGTGA    |
| Nr2f2 F  | CTTTGGAAGAGTACGTTAGG     |
| Nr2f2 R  | AACAATTGCTCTATGACTGA     |
| Hand2 F  | TCGGTTATCTAGTGCTGTC      |
| Hand2 R  | ATACTTACAATGTTTACACCTTCA |
| Hoxa10 F | GGCAGTTCCAAAGGCGAAAA     |
| Hoxa10 R | CAAAAAAAGCCAGAACAAC      |
| Wnt7b F  | TGAGGCGGGCAGAAAGG        |
| Wnt7b R  | CCTGACACACCGTGACACTTACA  |
| Muc1 F   | ATTGTGTTAAGAAGTAGTAAGAC  |
| Muc1 R   | AAGTGGTCACCACAGCTGGG     |
| Coch F   | GTGCAGCAAAACCTGCTACAA    |
| Coch R   | AGCTAGGACGTTCTCTTTGGT    |
| GAPDH F  | ATGGTGAAGGTCGGTGTGA      |
| GAPDH R  | TGAGTGGAGTCATACTGGAACAT  |

---

**Supplementary Table S2. Primers for vector construct.**

| <b>Primer name</b>   | <b>Sequence</b>                        |
|----------------------|----------------------------------------|
| STAT3-pBiFC-VC155-F  | GCCGAATTCATGGCTCAGTGGAAACCAGCTG        |
| STAT3-pBiFC-VC155-R  | GAAGGTACCTCACATGGGGGAGGTAGCAC          |
| ERK1- pBiFC-VN173-F  | GAAGTCGACATGGCGGCGGCGGCGG              |
| ERK1- pBiFC-VN173-R  | GCCGGTACCTTAAGATCTGTATCCTGGCTGGAATCTAG |
| STAT3-Zsgreen-F      | GCCGAATTCATGGCTCAGTGGAAACCAGCTG        |
| STAT3-Zsgreen-R      | GAAGGTACCTCACATGGGGGAGGTAGCAC          |
| Cox2-P1-Luciferase-F | GGGGGTACCTTCGCTACTCCATCCTCACACC        |
| Cox2-P1-Luciferase-R | GGGAAGCTTGCTCCACTTCATCGGAATGCTA        |
| Cox2-P2-Luciferase-F | GGGGGTACCCGCAGACTCAGCGAAC              |
| Cox2-P2-Luciferase-R | GGGAAGCTTTTTCCGCTTAGGCTTTCC            |
| Cox2-P3-Luciferase-F | GGGGGTACCCACCAGTACAGATGTGGACCCT        |
| Cox2-P3-Luciferase-R | GGGAAGCTTGCTCAAGAGTGTCACAGCTTCC        |

**Supplementary Table S3. Primers for *in situ* DIG-labelled probes.**

| <b>Primer name</b> | <b>Sequence</b>        |
|--------------------|------------------------|
| Igf1r-DIG-F        | GATTGATCCTAATGTATG     |
| Igf1r-DIG-R        | TTATTTCTCTTTCTATGG     |
| Msx1-DIG-F         | CCTGACTTAGGTGGGTCCAG   |
| Msx1-DIG-R         | GTCCTTTTGGCCTCTGGTCT   |
| Igf1-DIG-F         | ACAATAATAAGTCCAATAACAT |
| Igf1-DIG-R         | GAAGAGGTGAAGATAAGG     |
| Ptgs2 (Cox2)-DIG-F | ACTCTGCTCCGAAGAATCTC   |
| Ptgs2 (Cox2)-DIG-R | ACATCCCTGAGAACCTGCAG   |
| Igf2-DIG-F         | ATGGGGATCCCAGTGGGGAA   |
| Igf2-DIG-R         | GTCCAGCAACCATCAGGAAT   |

**Supplementary Table S4. ChIP-PCR primers.**

| <b>Primer name</b> | <b>Sequence</b>        |
|--------------------|------------------------|
| STAT3-ChIP-P1-F    | TTCGCTACTCCATCCTCACACC |
| STAT3-ChIP-P1-R    | GCTCCACTTCATCGGAATGCTA |
| STAT3-ChIP-P2-F    | CGCAGACTCAGCGAACCA     |
| STAT3-ChIP-P2-R    | TTTCCGCTTAGGCTTTCC     |
| STAT3-ChIP-P3-F    | CACCAGTACAGATGTGGACCCT |
| STAT3-ChIP-P3-R    | GCTCAAGAGTGTCACAGCTTCC |
